# Supplementary material for: Potential Anti-Inflammatory Constituents from Aesculus wilsonii Seeds
Source: MDPI journal article supplement (doi:10.3390/molecules29051136), 2024-03-03
Supplement: s1 [file s1]

# Supporting Information

Article

## Bioactive Constituents from *Aesculus wilsonii* Seeds

Ping Zhang <sup>1</sup>, Lequan Yu <sup>1</sup>, Huina Cao <sup>1</sup>, Jingya Ruan <sup>2</sup>, Fei Li <sup>1</sup>, Lijie Wu <sup>1</sup>, Yi Zhang <sup>1,2,\*</sup> and Tao Wang <sup>1,2,\*</sup>

<sup>1</sup> Tianjin Key Laboratory of TCM Chemistry and Analysis, Tianjin University of Traditional Chinese Medicine, 10 Poyanghu Road, West Area, Tuanbo New Town, Jinghai District, Tianjin 301617, China; zp10259611@163.com (P.Z.); 18822575726@163.com (L.Y.); sxcaonanayy@163.com (H.C.); lf18641423285@163.com (F.L.); wulj0816@163.com (L.W.)

<sup>2</sup> Institute of TCM, Tianjin University of Traditional Chinese Medicine, 10 Poyanghu Road, West Area, Tuanbo New Town, Jinghai District, Tianjin 301617, China; ruanjingya@tjutcm.edu.cn

\* Correspondence: zhwwxzh@tjutcm.edu.cn (Y.Z.); wangtao@tjutcm.edu.cn (T.W.); Tel./Fax: +86-22-5959-6168 (T.W.)

|                                                                                                                 |    |
|-----------------------------------------------------------------------------------------------------------------|----|
| Figure S1. $^1\text{H}$ NMR (600 MHz, $\text{CD}_3\text{OD}$ ) spectrum of <b>1</b> .....                       | 3  |
| Figure S2. $^{13}\text{C}$ NMR (150 MHz, $\text{CD}_3\text{OD}$ ) spectrum of <b>1</b> .....                    | 3  |
| Figure S3. $^1\text{H}$ $^1\text{H}$ COSY ( $\text{CD}_3\text{OD}$ ) spectrum of <b>1</b> .....                 | 4  |
| Figure S4. HSQC ( $\text{CD}_3\text{OD}$ ) spectrum of <b>1</b> .....                                           | 4  |
| Figure S5. HMBC ( $\text{CD}_3\text{OD}$ ) spectrum of <b>1</b> .....                                           | 5  |
| Figure S6. ESI-Q-Orbitrap-MS spectrum of <b>1</b> .....                                                         | 5  |
| Figure S7. $^1\text{H}$ NMR (600 MHz, $\text{CD}_3\text{OD}$ ) spectrum of <b>2</b> .....                       | 6  |
| Figure S8. $^{13}\text{C}$ NMR (150 MHz, $\text{CD}_3\text{OD}$ ) spectrum of <b>2</b> .....                    | 6  |
| Figure S9. $^1\text{H}$ $^1\text{H}$ COSY ( $\text{CD}_3\text{OD}$ ) spectrum of <b>2</b> .....                 | 7  |
| Figure S10. HSQC ( $\text{CD}_3\text{OD}$ ) spectrum of <b>2</b> .....                                          | 7  |
| Figure S11. HMBC ( $\text{CD}_3\text{OD}$ ) spectrum of <b>2</b> .....                                          | 8  |
| Figure S12. ESI-Q-Orbitrap-MS spectrum of <b>2</b> .....                                                        | 8  |
| Figure S13. $^1\text{H}$ NMR (600 MHz, $\text{CD}_3\text{OD}$ ) spectrum of <b>3</b> .....                      | 9  |
| Figure S14. $^{13}\text{C}$ NMR (125 MHz, $\text{CD}_3\text{OD}$ ) spectrum of <b>3</b> .....                   | 9  |
| Figure S15. $^1\text{H}$ $^1\text{H}$ COSY ( $\text{CD}_3\text{OD}$ ) spectrum of <b>3</b> .....                | 10 |
| Figure S16. HSQC ( $\text{CD}_3\text{OD}$ ) spectrum of <b>3</b> .....                                          | 10 |
| Figure S17. HMBC ( $\text{CD}_3\text{OD}$ ) spectrum of <b>3</b> .....                                          | 11 |
| Figure S18. ESI-Q-Orbitrap-MS spectrum of <b>3</b> .....                                                        | 11 |
| Figure S19. $^1\text{H}$ NMR (600 MHz, $\text{CD}_3\text{OD}$ ) spectrum of <b>4</b> .....                      | 12 |
| Figure S20. $^{13}\text{C}$ NMR (150 MHz, $\text{CD}_3\text{OD}$ ) spectrum of <b>4</b> .....                   | 12 |
| Figure S21. $^1\text{H}$ $^1\text{H}$ COSY ( $\text{CD}_3\text{OD}$ ) spectrum of <b>4</b> .....                | 13 |
| Figure S22. HSQC ( $\text{CD}_3\text{OD}$ ) spectrum of <b>4</b> .....                                          | 13 |
| Figure S23. HMBC ( $\text{CD}_3\text{OD}$ ) spectrum of <b>4</b> .....                                          | 14 |
| Figure S24. NOESY ( $\text{CD}_3\text{OD}$ ) spectrum of <b>4</b> .....                                         | 14 |
| Figure S25. ESI-Q-Orbitrap-MS spectrum of <b>4</b> .....                                                        | 15 |
| Figure S26. MTT assay of compounds <b>1–18</b> at the concentration of 50 $\mu\text{M}$ on RAW264.7 cells ..... | 16 |

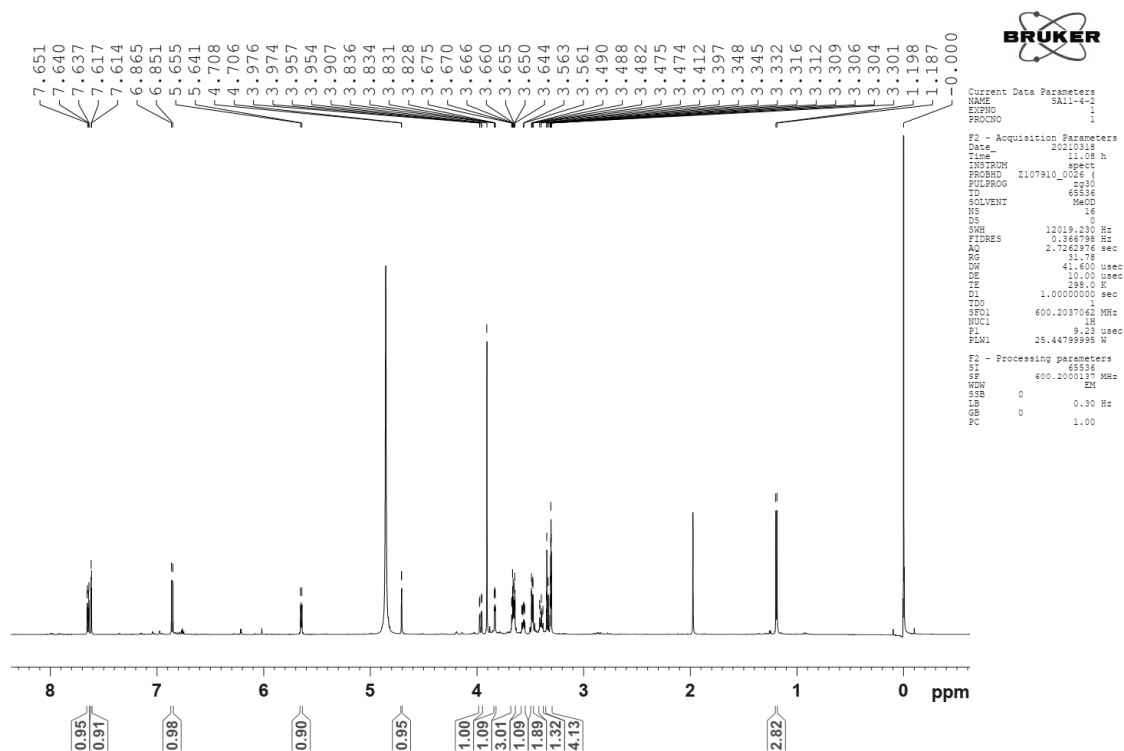

Figure S1.  $^1\text{H}$  NMR (500 MHz,  $\text{CD}_3\text{OD}$ ) spectrum of **1**

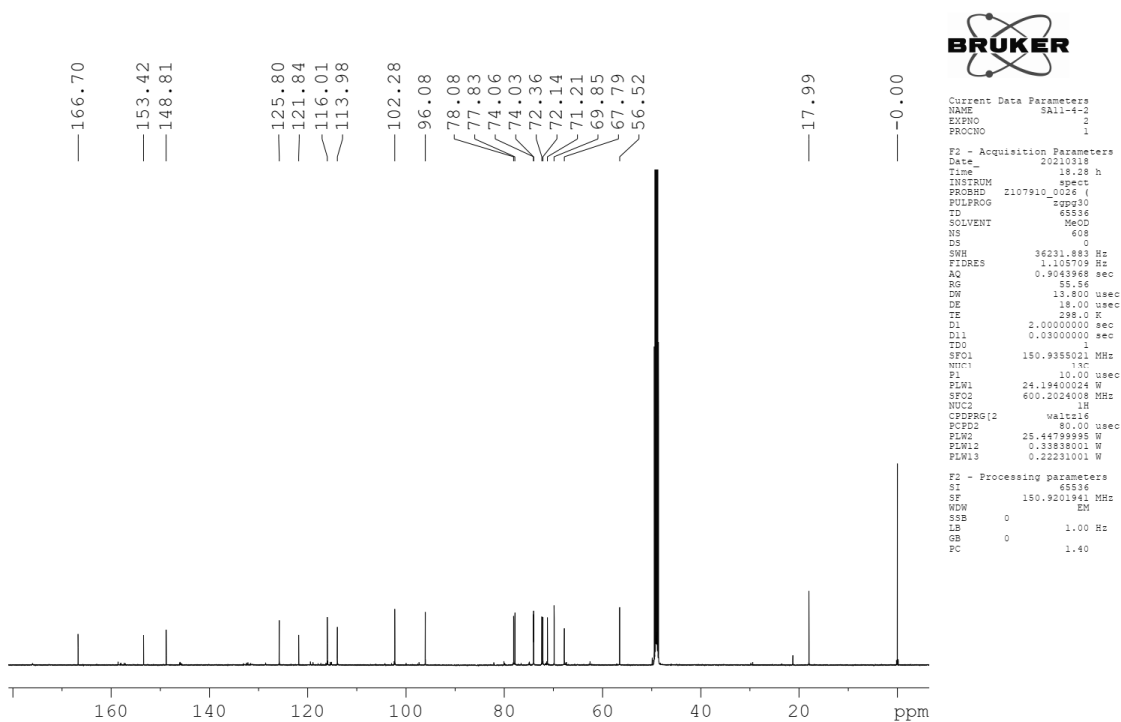

Figure S2.  $^{13}\text{C}$  NMR (125 MHz,  $\text{CD}_3\text{OD}$ ) spectrum of **1**

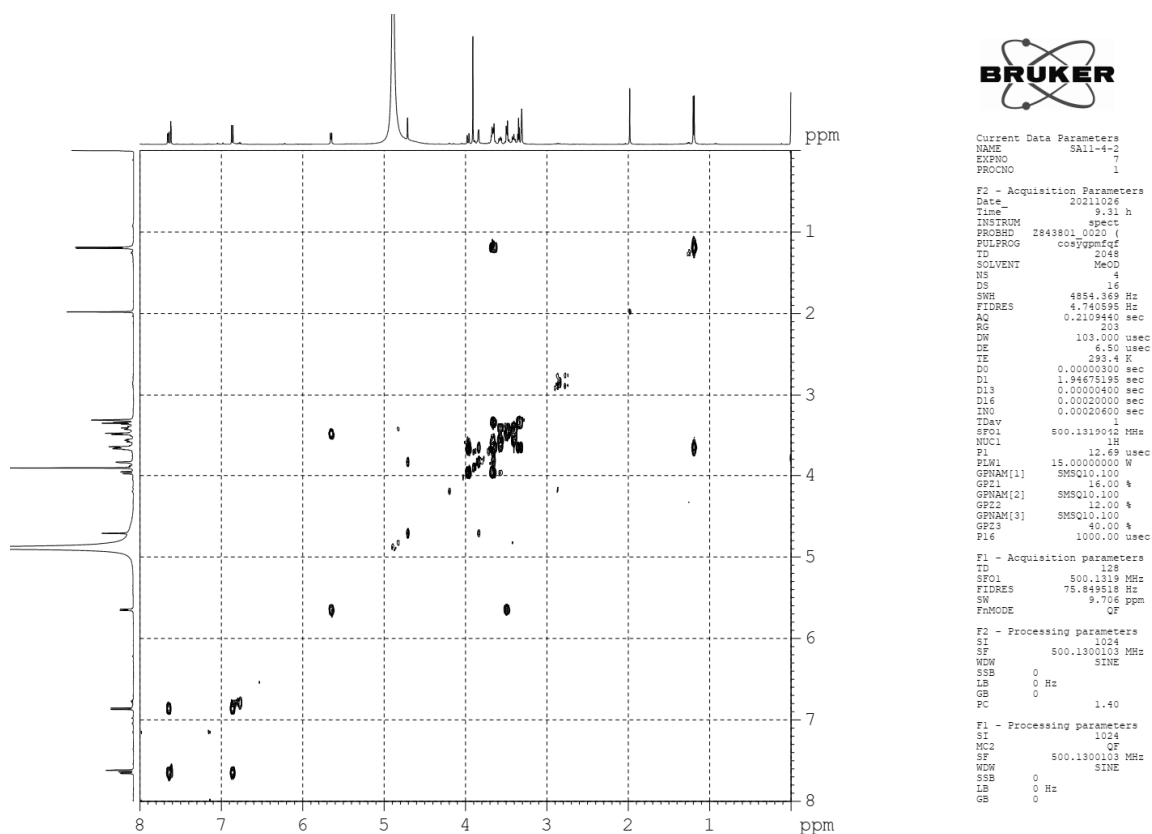

Figure S3.  $^1\text{H}$ - $^1\text{H}$  COSY ( $\text{CD}_3\text{OD}$ ) spectrum of 1

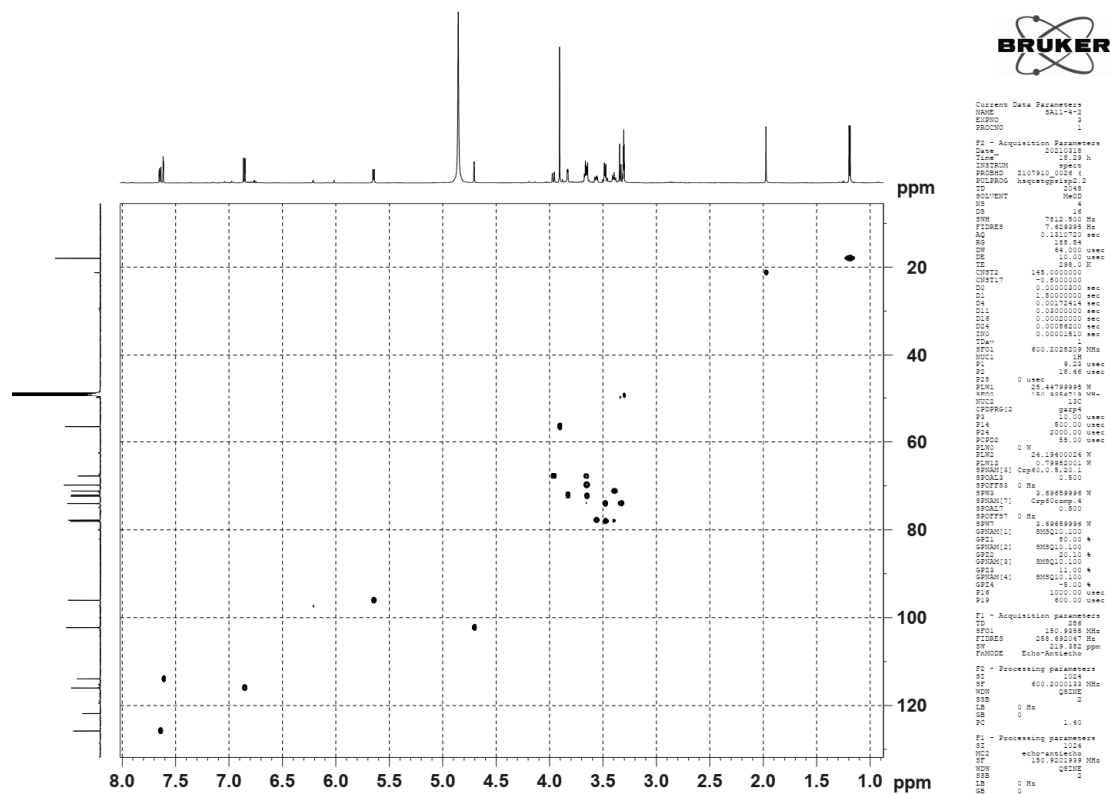

Figure S4. HSQC ( $\text{CD}_3\text{OD}$ ) spectrum of 1

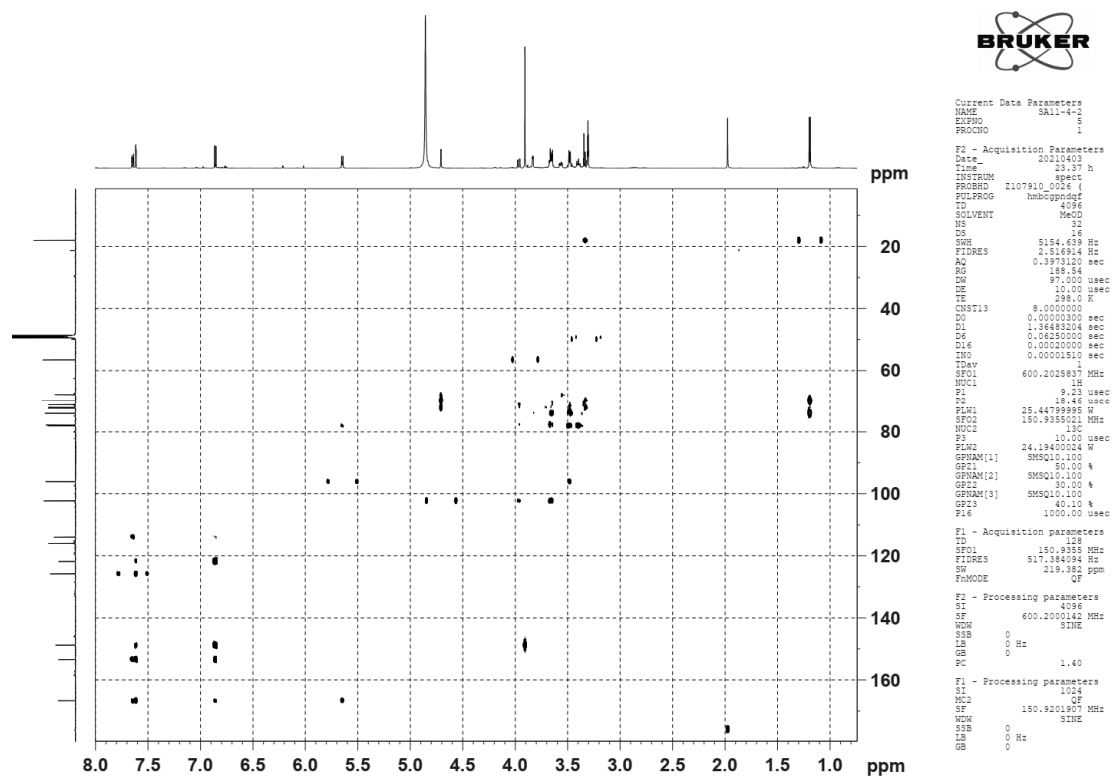

Figure S5. HMBC (CD<sub>3</sub>OD) spectrum of **1**

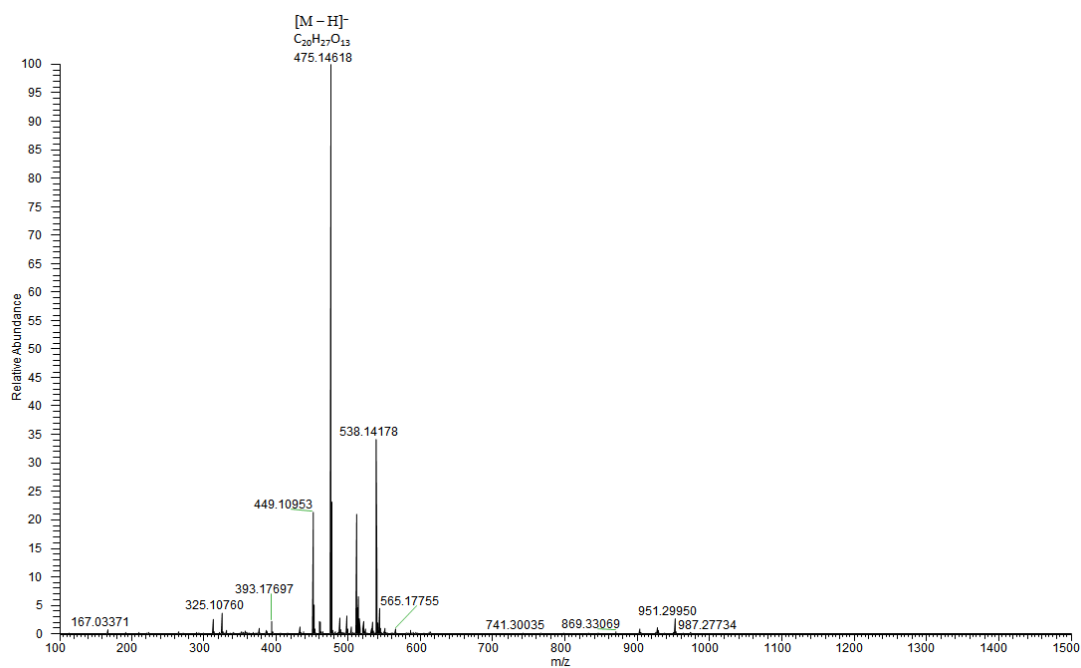

Figure S6. ESI-Q-Orbitrap-MS spectrum of **1**

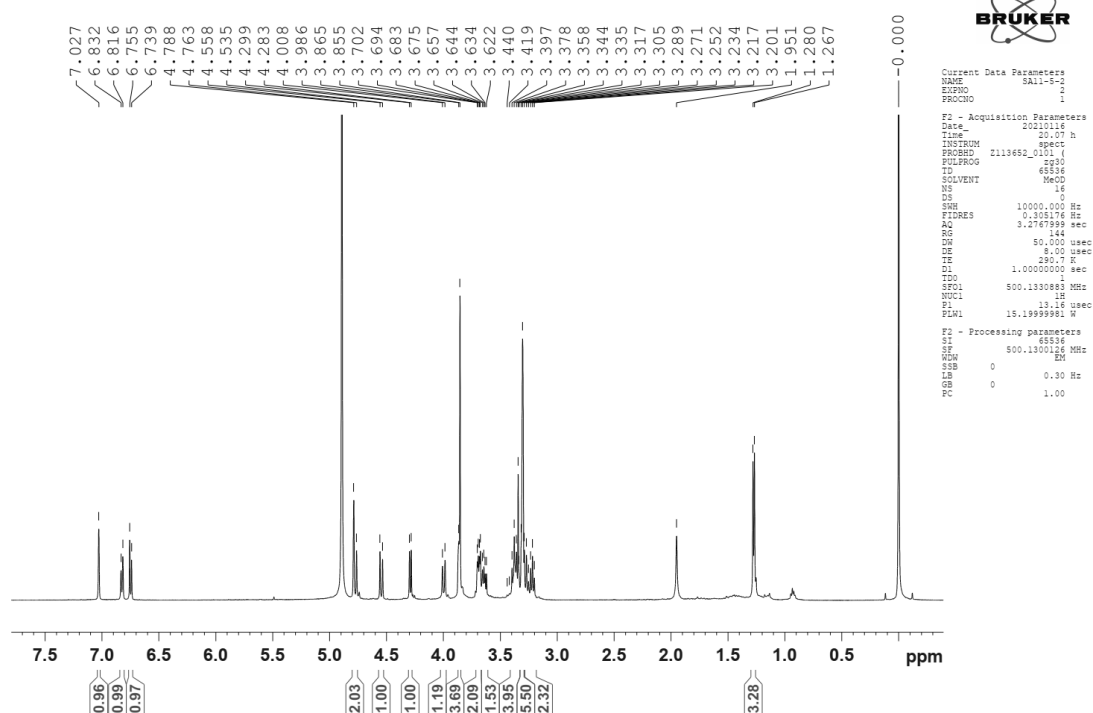

Figure S7.  $^1\text{H}$  NMR (500 MHz,  $\text{CD}_3\text{OD}$ ) spectrum of **2**

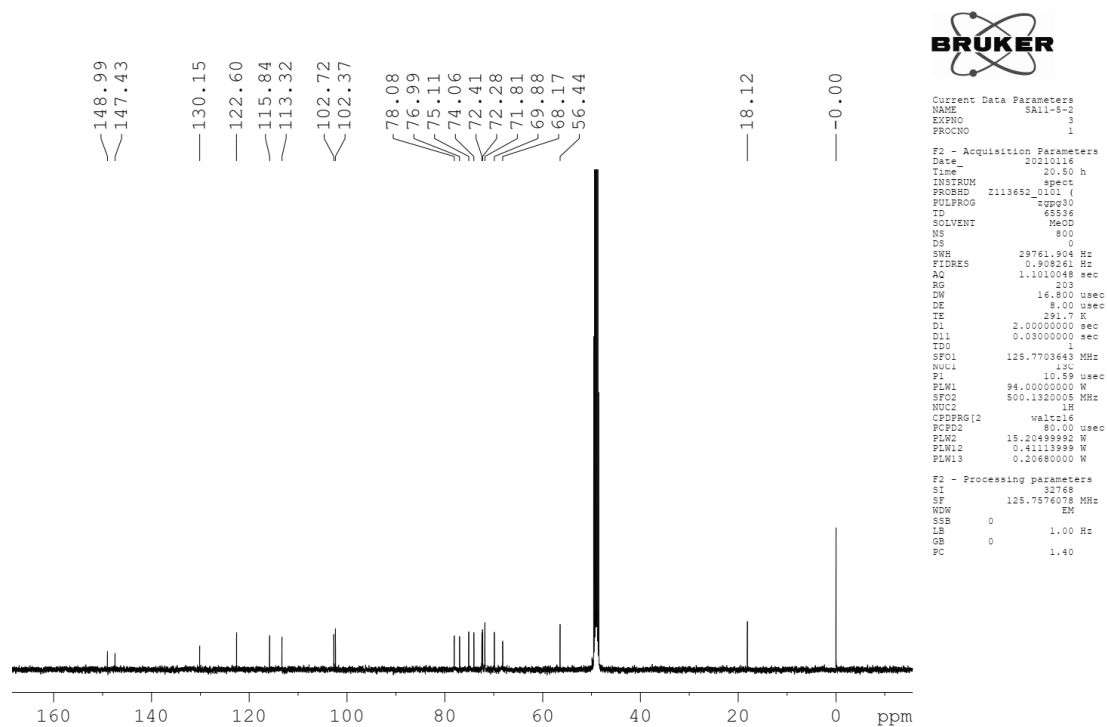

Figure S8.  $^{13}\text{C}$  NMR (125 MHz,  $\text{CD}_3\text{OD}$ ) spectrum of **2**



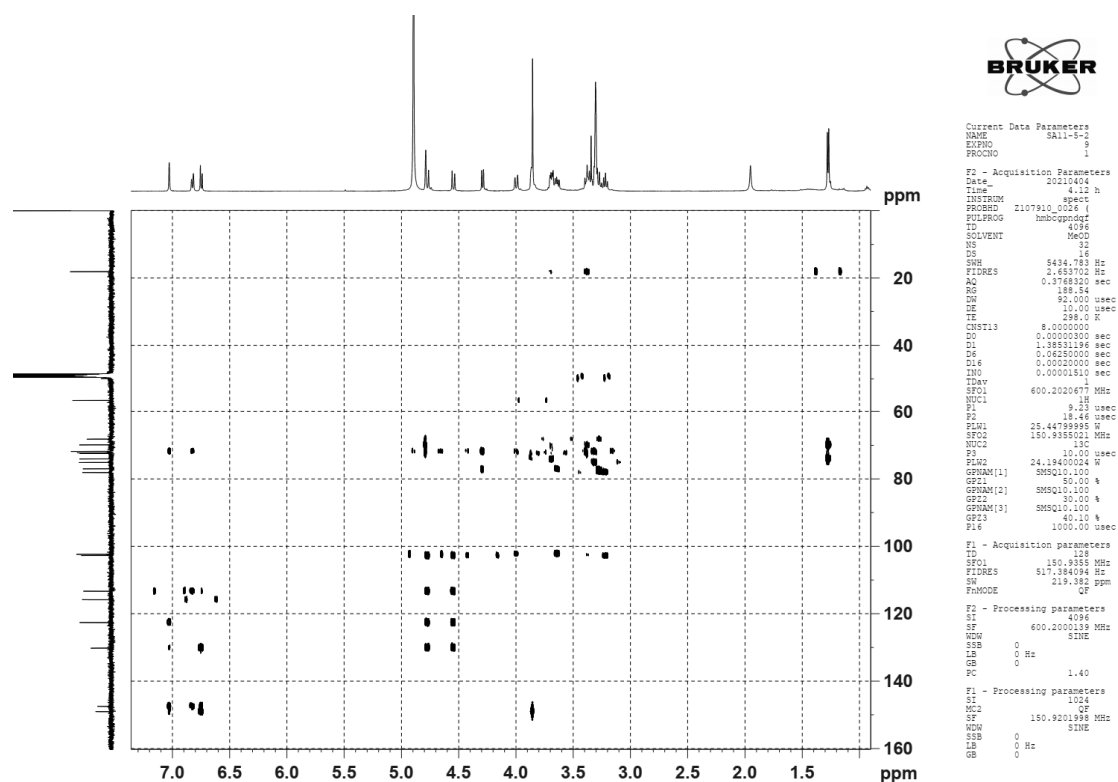

Figure S11. HMBC (CD<sub>3</sub>OD) spectrum of **2**

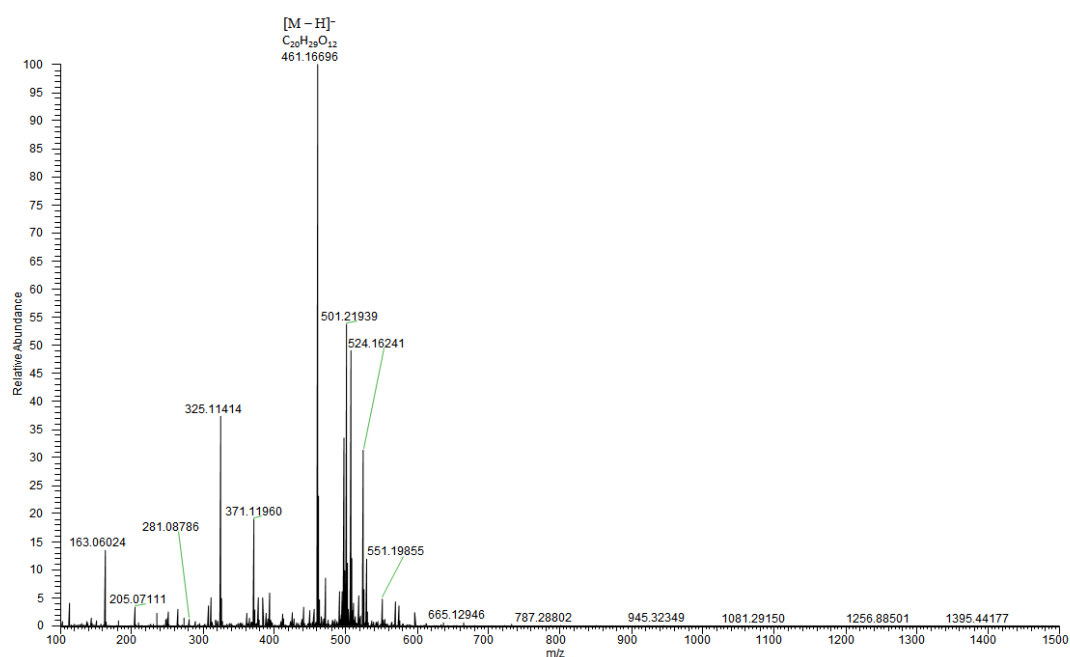

Figure S12. ESI-Q-Orbitrap-MS spectrum of **2**



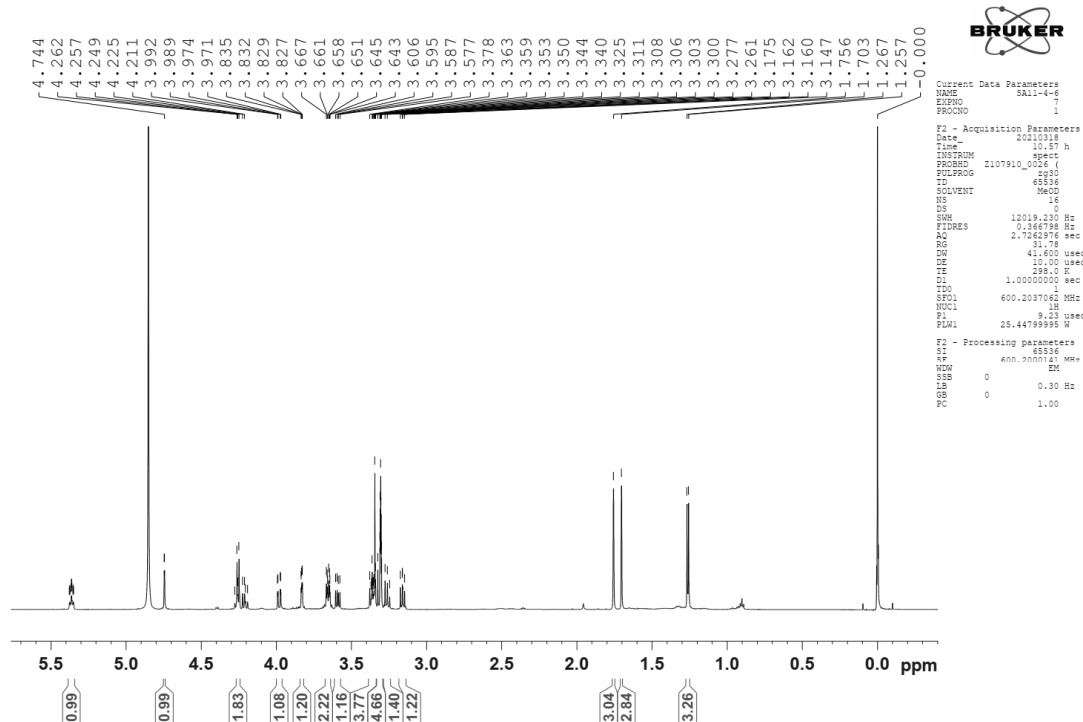

Figure S13.  $^1\text{H}$  NMR (600 MHz,  $\text{CD}_3\text{OD}$ ) spectrum of **3**

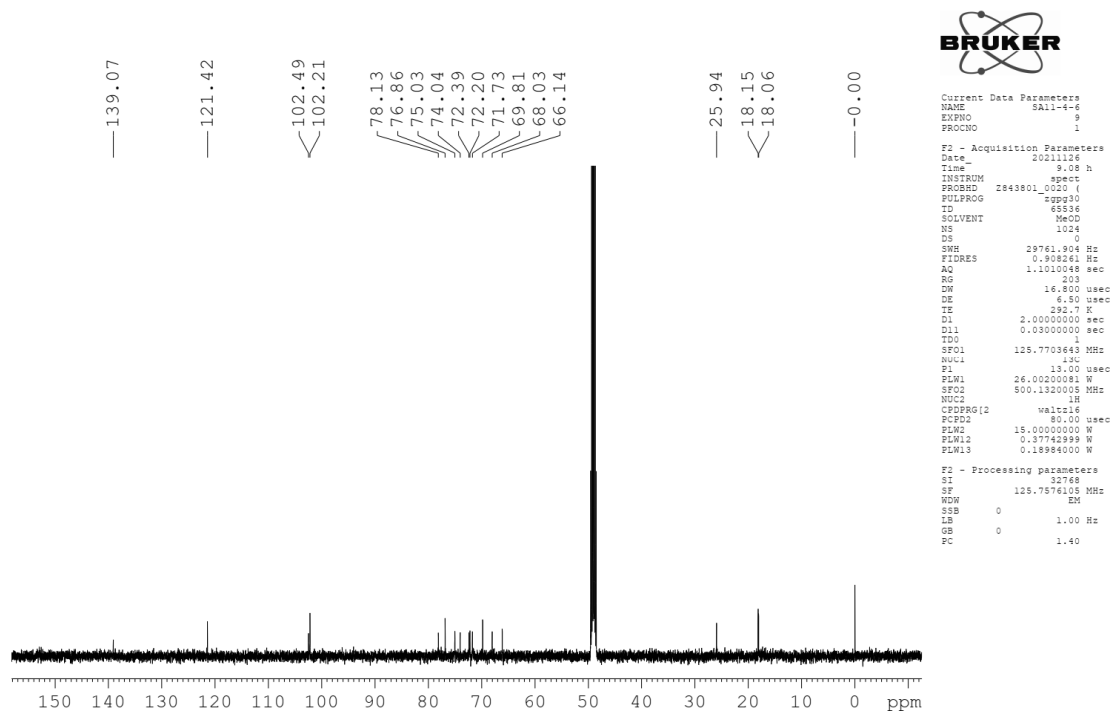

Figure S14.  $^{13}\text{C}$  NMR (125 MHz,  $\text{CD}_3\text{OD}$ ) spectrum of **3**

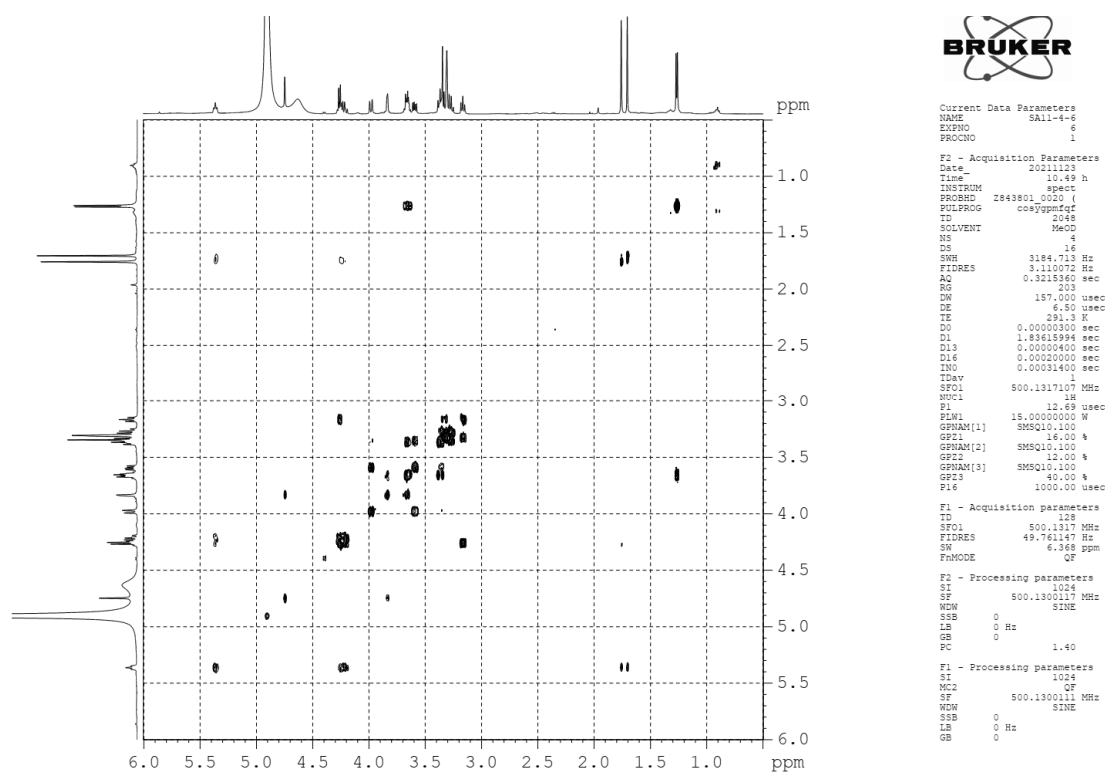

Figure S15.  $^1\text{H}$   $^1\text{H}$  COSY ( $\text{CD}_3\text{OD}$ ) spectrum of **3**

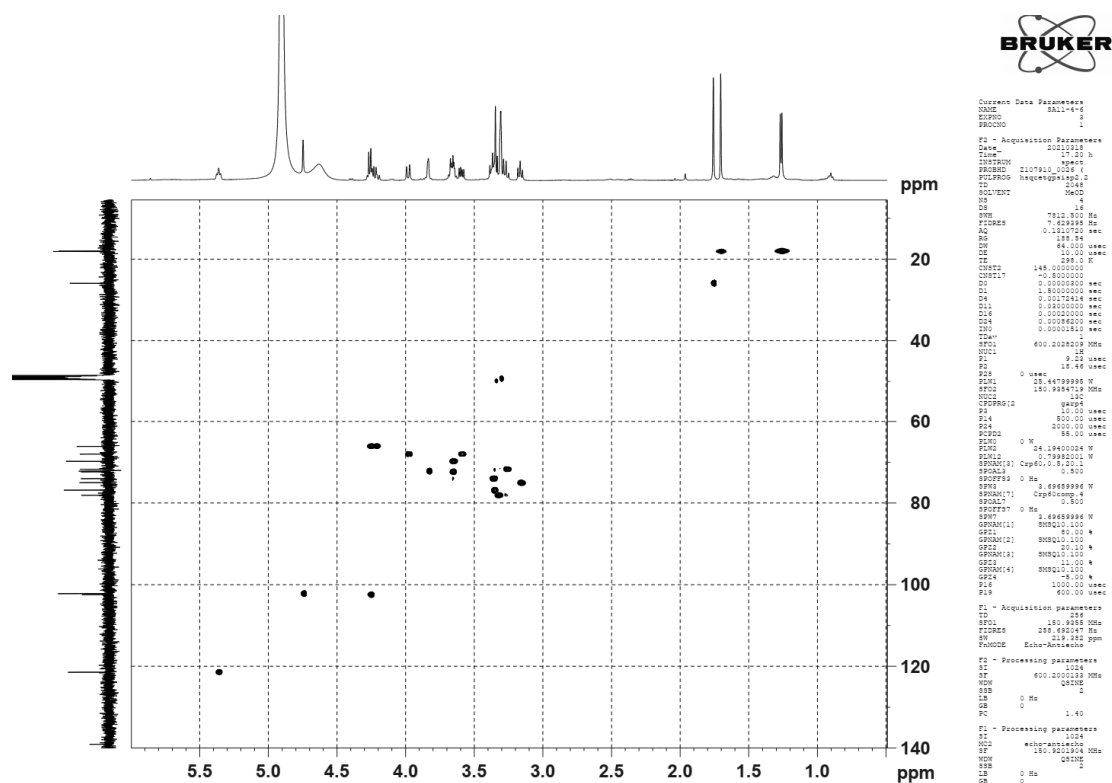

Figure S16. HSQC ( $\text{CD}_3\text{OD}$ ) spectrum of **3**

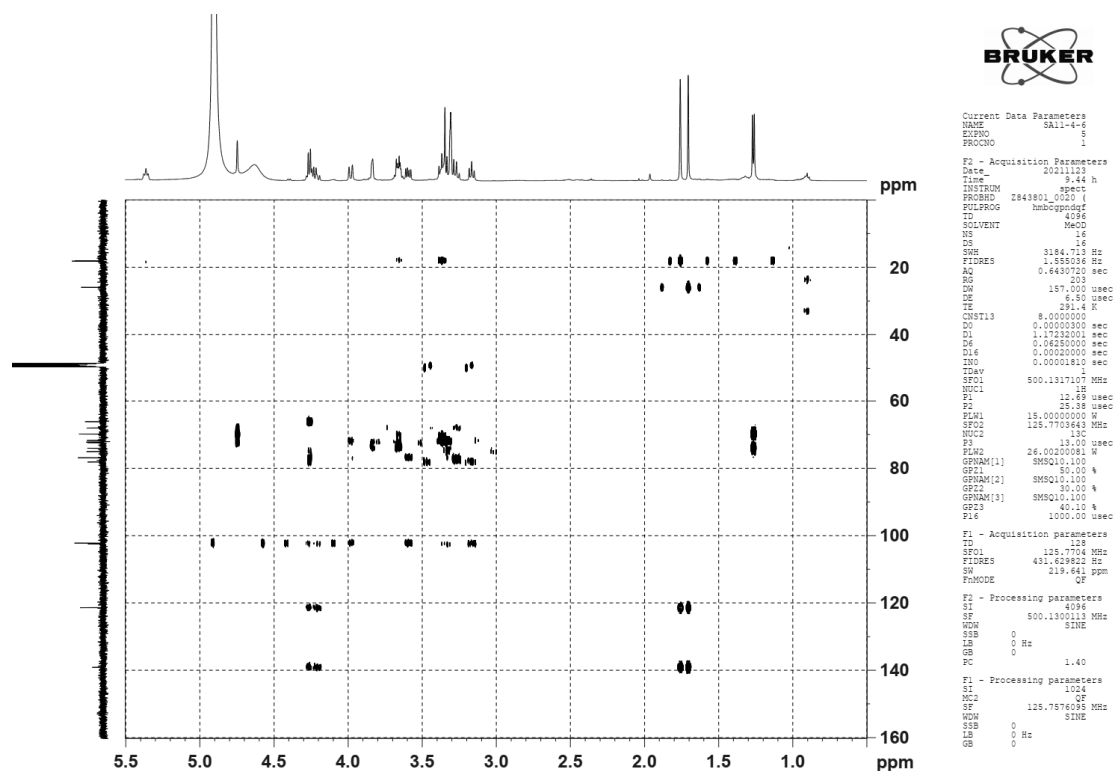

Figure S17. HMBC (CD<sub>3</sub>OD) spectrum of **3**

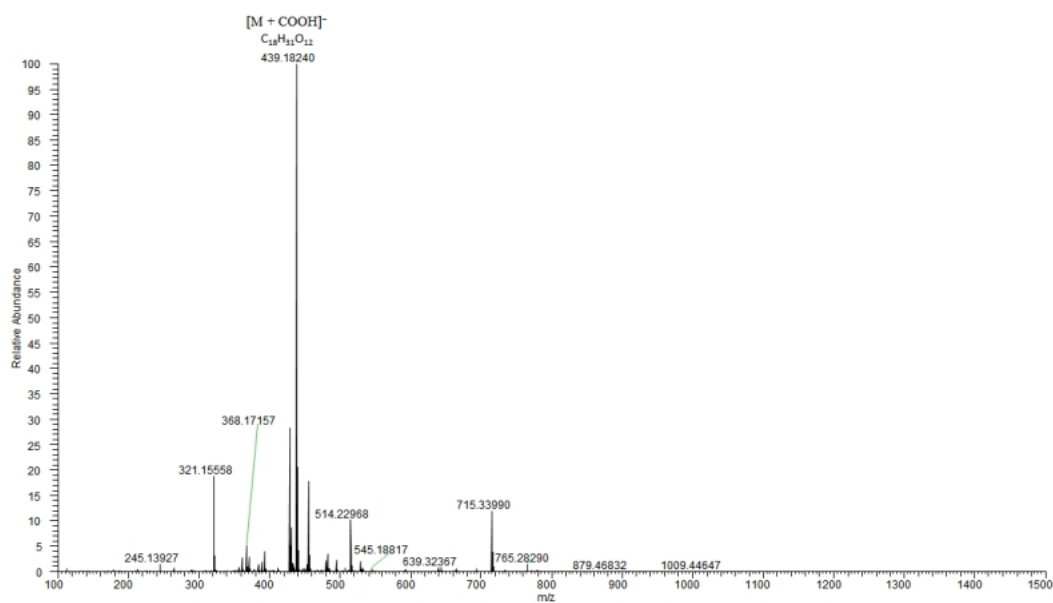

Figure S18. ESI-Q-Orbitrap-MS spectrum of **3**

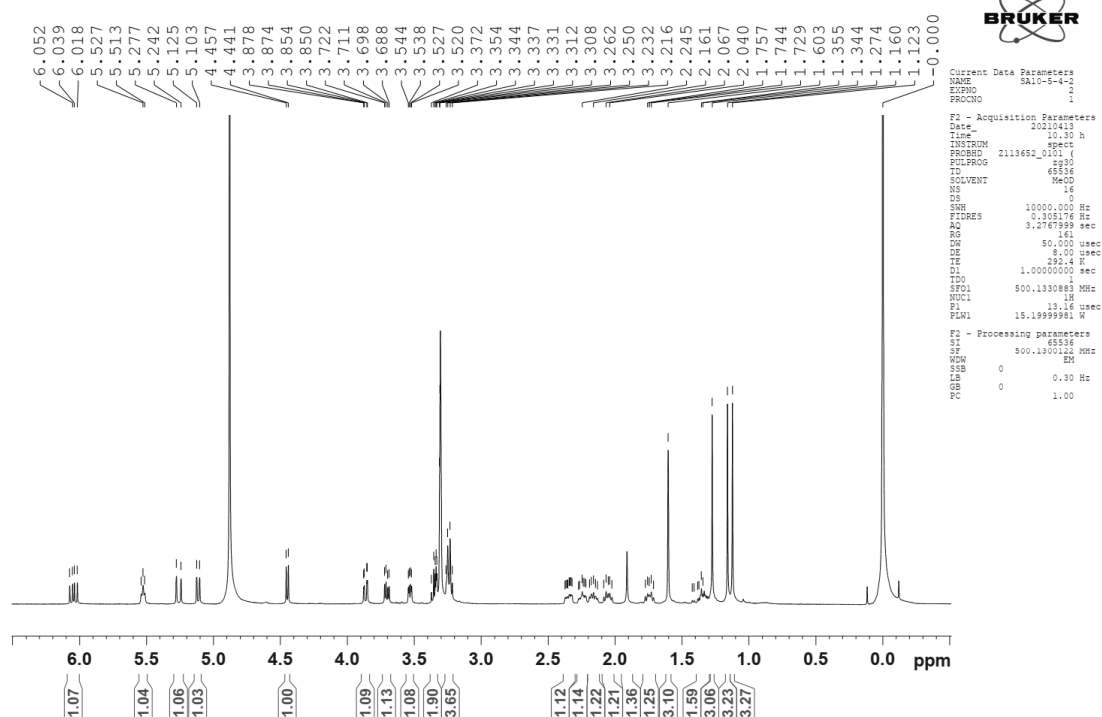

Figure S19.  $^1\text{H}$  NMR (500 MHz,  $\text{CD}_3\text{OD}$ ) spectrum of **4**

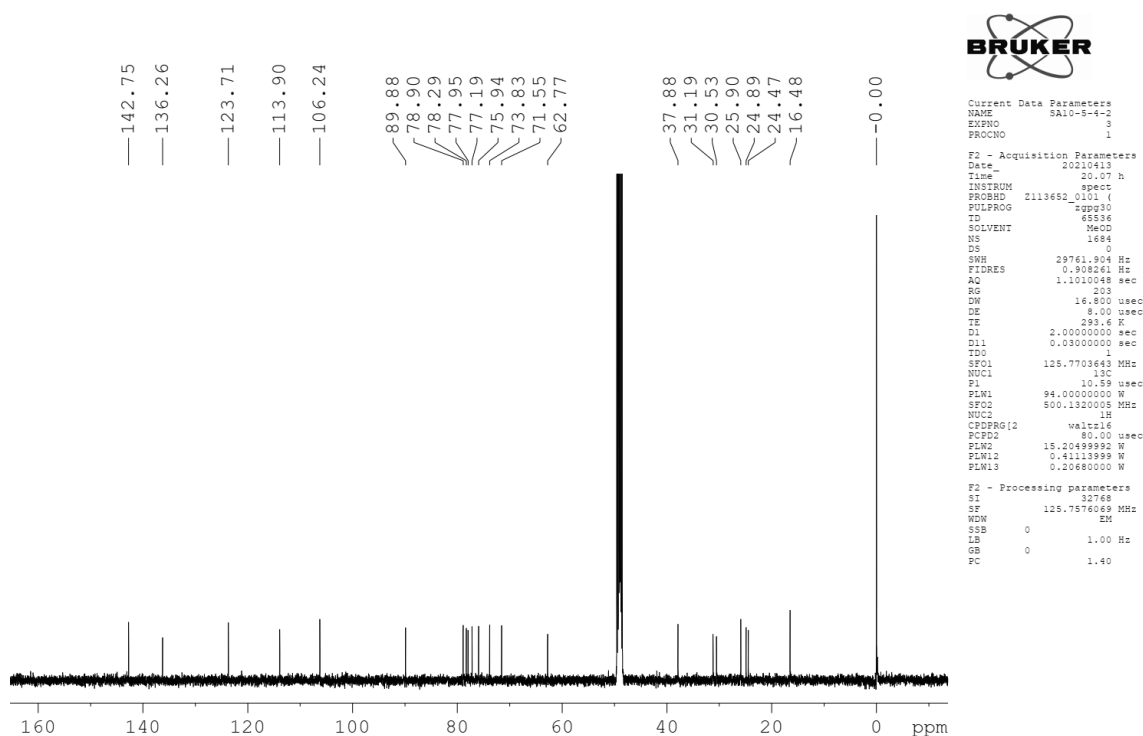

Figure S20.  $^{13}\text{C}$  NMR (125 MHz,  $\text{CD}_3\text{OD}$ ) spectrum of **4**

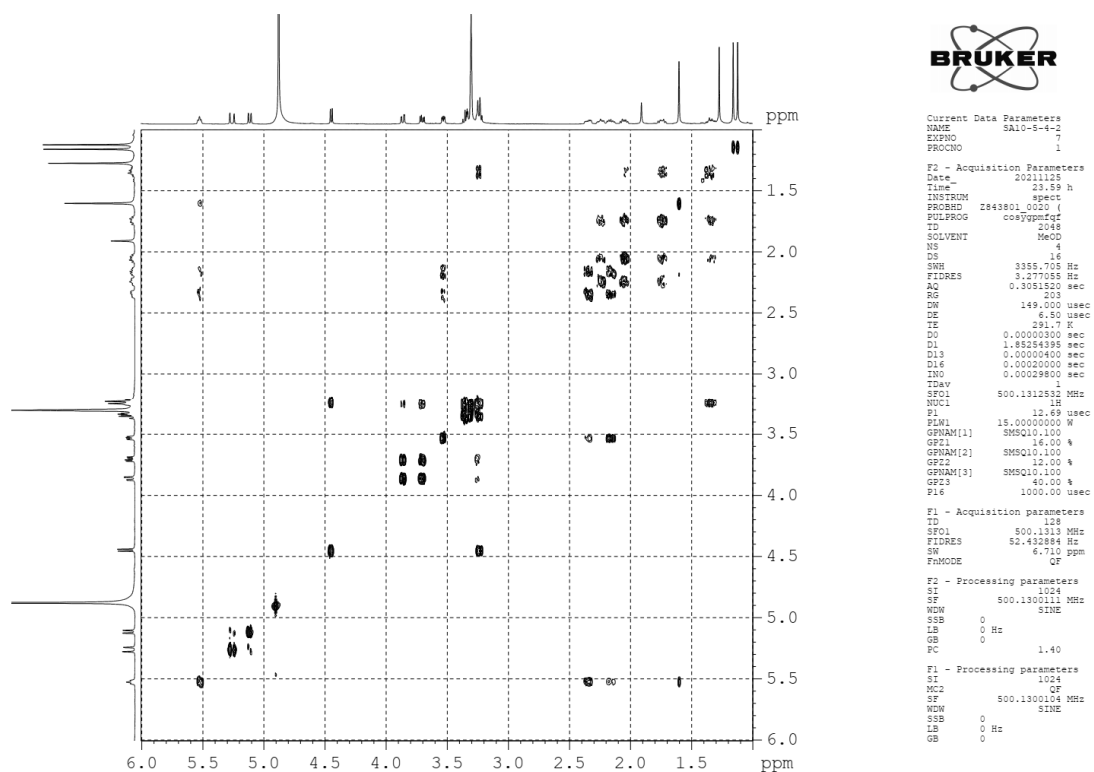

Figure S21.  $^1\text{H}$   $^1\text{H}$  COSY ( $\text{CD}_3\text{OD}$ ) spectrum of **4**

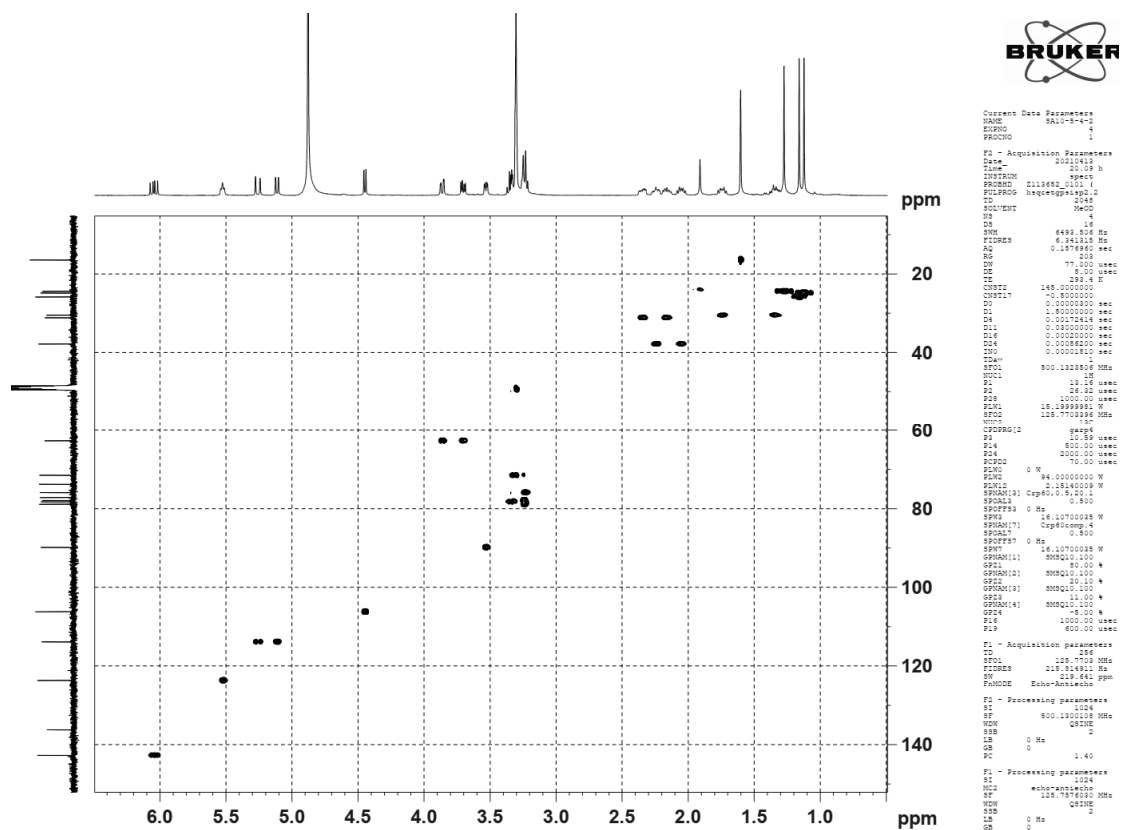

Figure S22. HSQC ( $\text{CD}_3\text{OD}$ ) spectrum of **4**

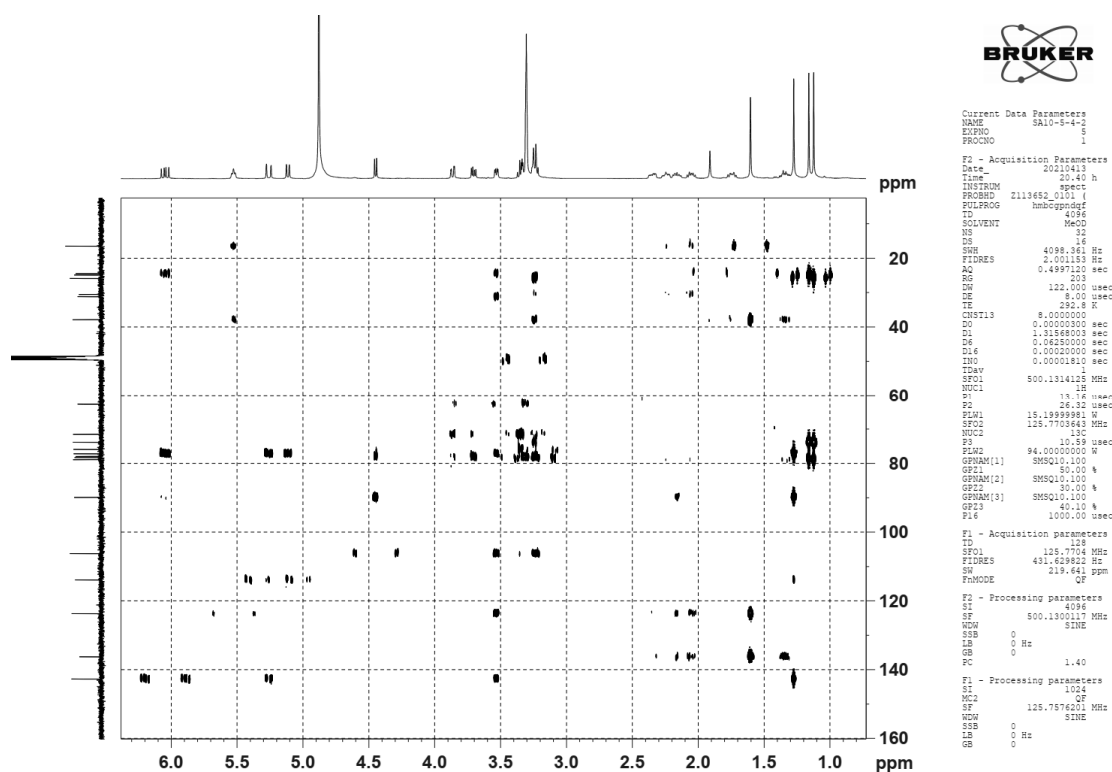

Figure S23. HMBC (CD<sub>3</sub>OD) spectrum of **4**

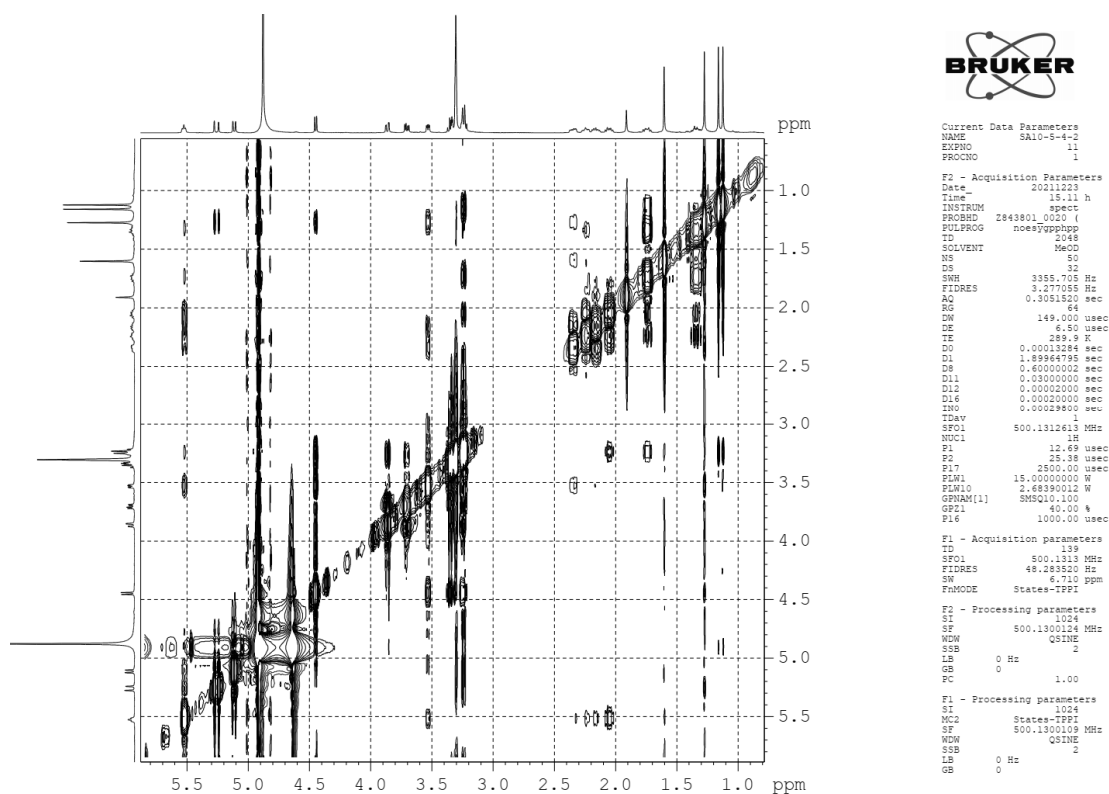

Figure S24. NOESY (CD<sub>3</sub>OD) spectrum of **4**

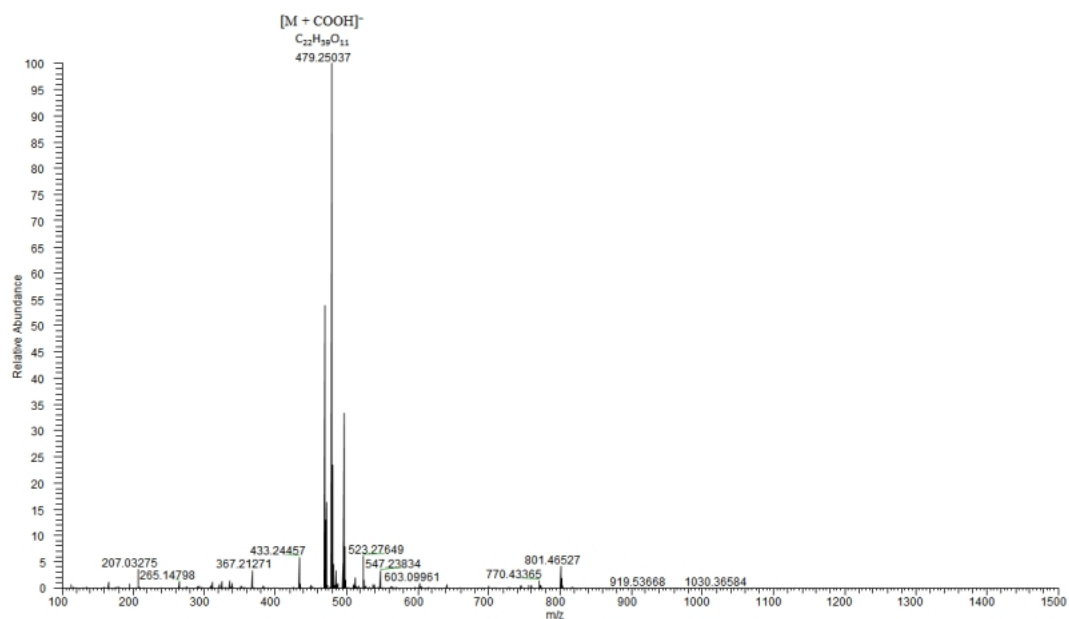

Figure S25. ESI-Q-Orbitrap-MS spectrum of **4**

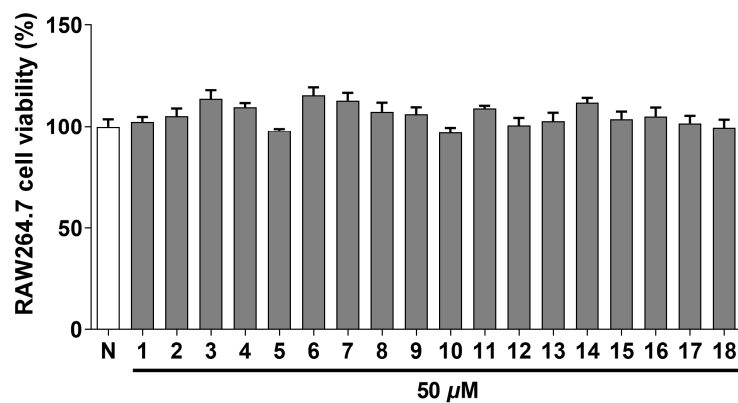

Figure S26. MTT asSAy of compounds **1–18** at the concentration of 50  $\mu$ M on RAW264.7 cells  
 Cell viability: percentage of normal group (set as 100%). Values represent the mean  $\pm$  SD of six determinations. \*\*\* $P < 0.001$  (Difference between compound-treated group and normal group).
